# Supplementary material
Source: PubMed Central journal article supplement (PMC4528746)
Supplement: supp_pp.15.00408_PP2015-00408R1_Supplemental_Figures_S1_S19.pdf [file supp_pp.15.00408_PP2015-00408R1_Supplemental_Figures_S1_S19.pdf]

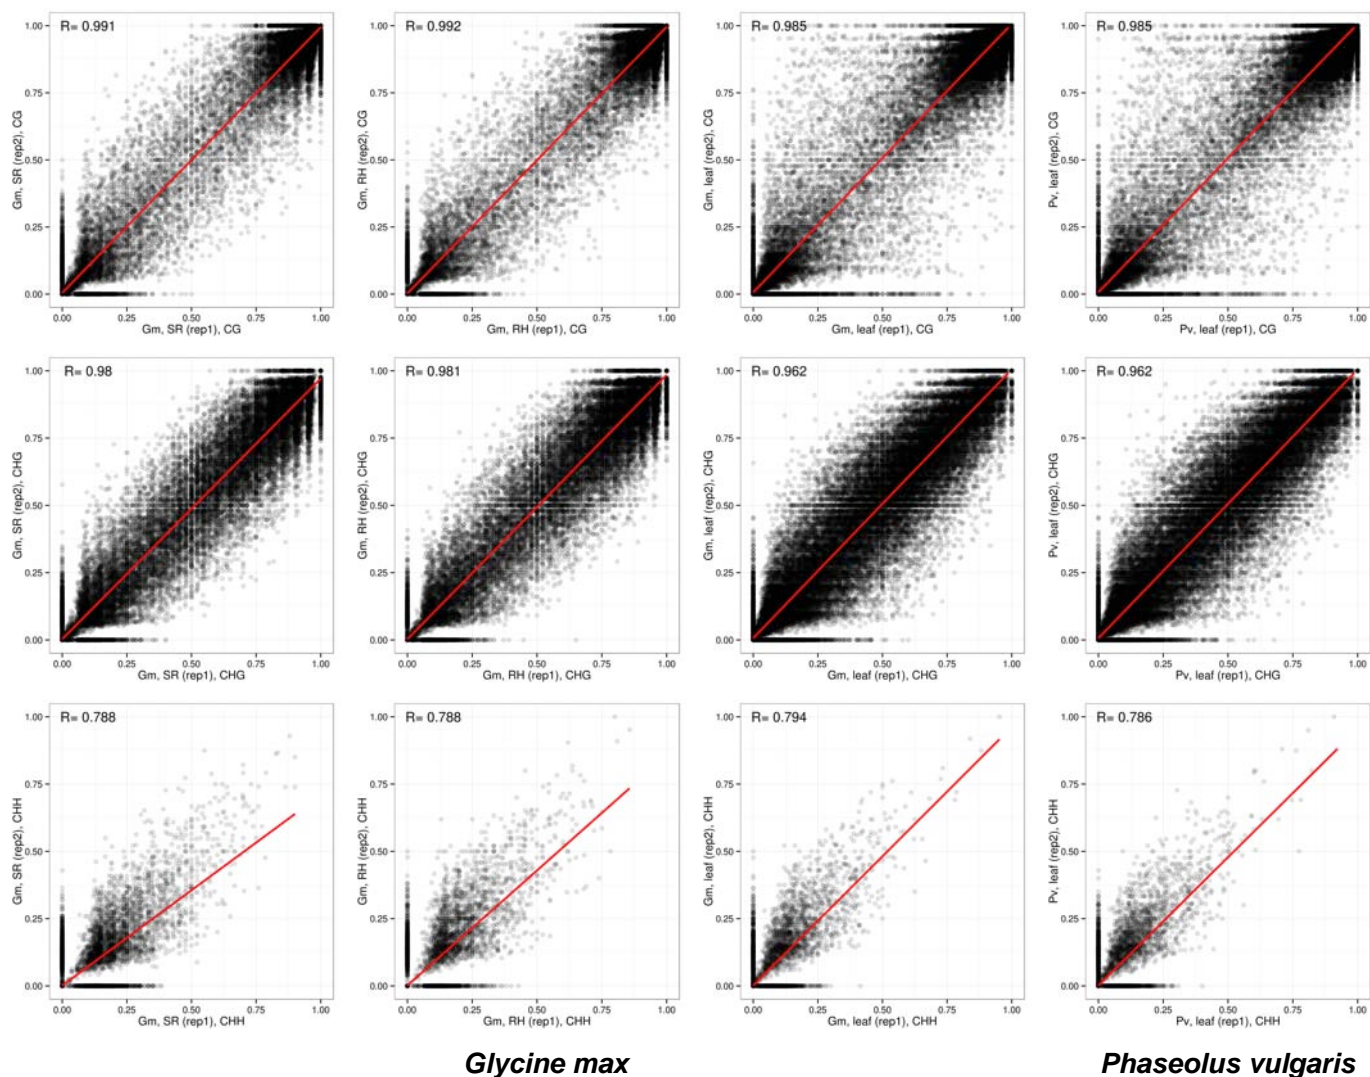

**Supplemental Figure S1.** Scatter plot of cytosine methylation between biological replicates. A total of 100,000 cytosine sites with more than 20 sequence reads were randomly selected. SR = stripped root, RH = root hair, R = Pearson correlation coefficient.

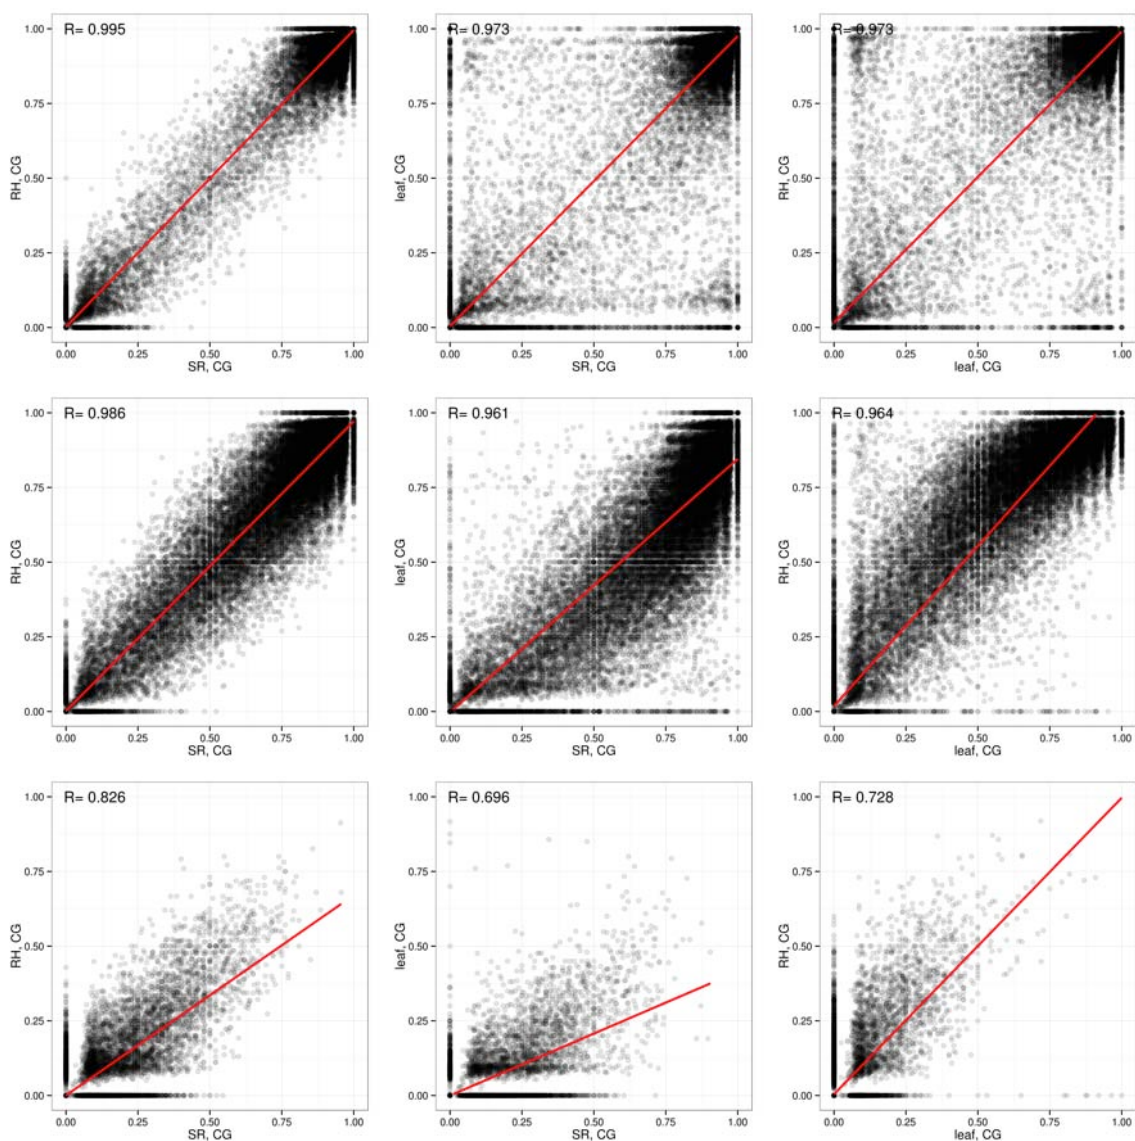

**Supplemental Figure S2.** Scatter plot of cytosine methylation between soybean tissues. A total of 100,000 cytosine sites with more than 20 sequence reads were randomly selected. SR = stripped root, RH = root hair, R = Pearson correlation coefficient.

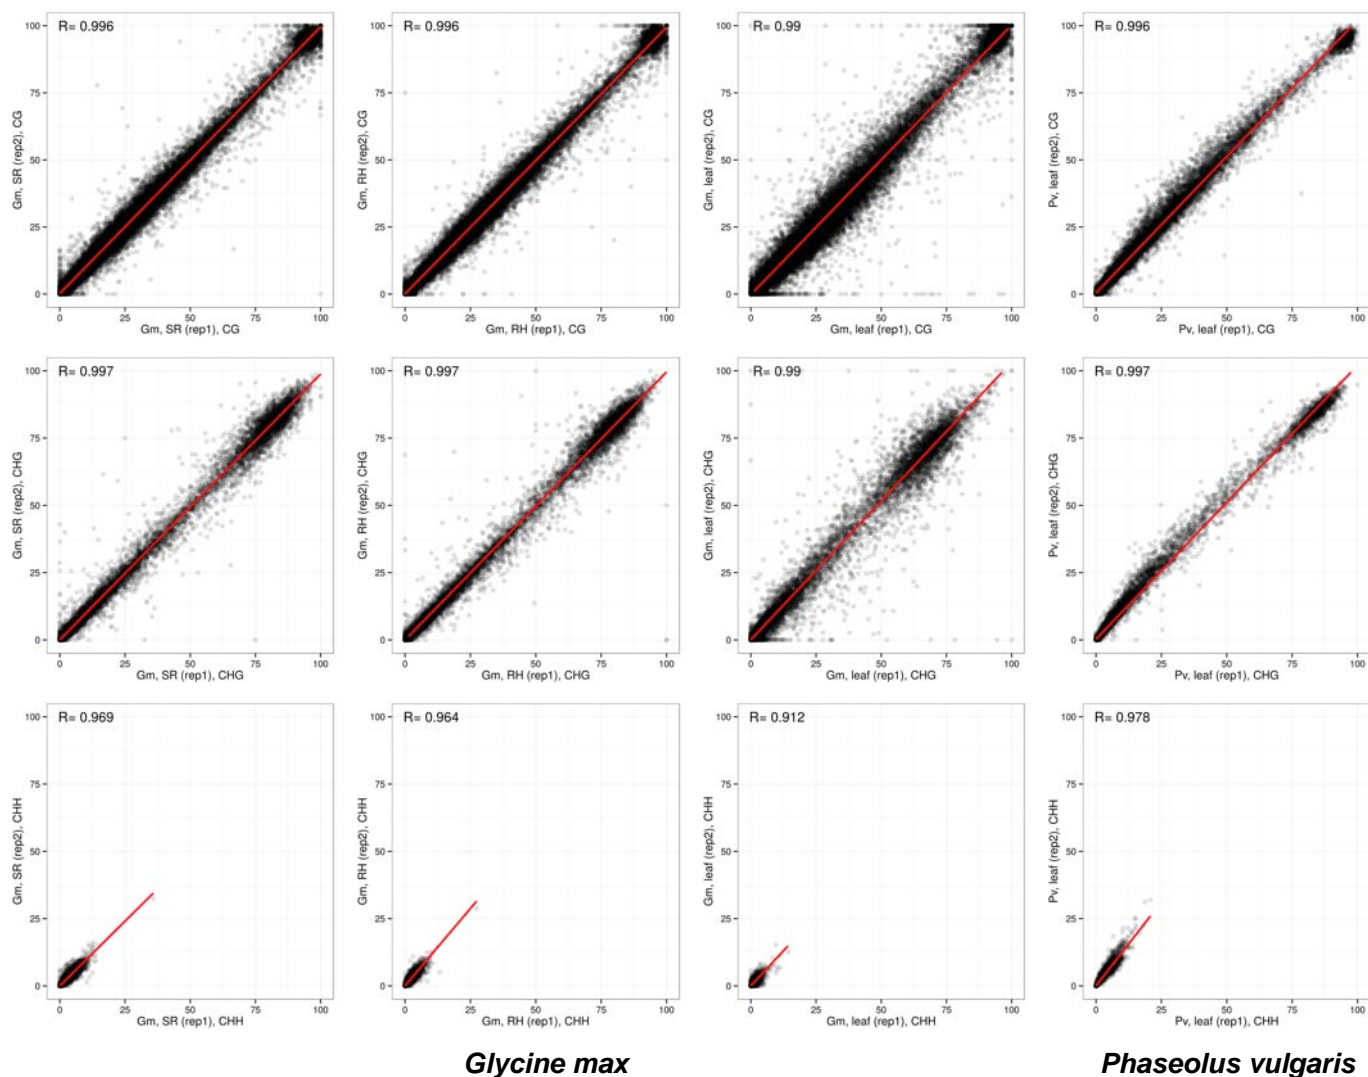

**Supplemental Figure S3.** Scatter plot of weighted methylation level of protein-coding genes between biological replicates. SR = stripped root, RH = root hair, R = Pearson correlation coefficient.

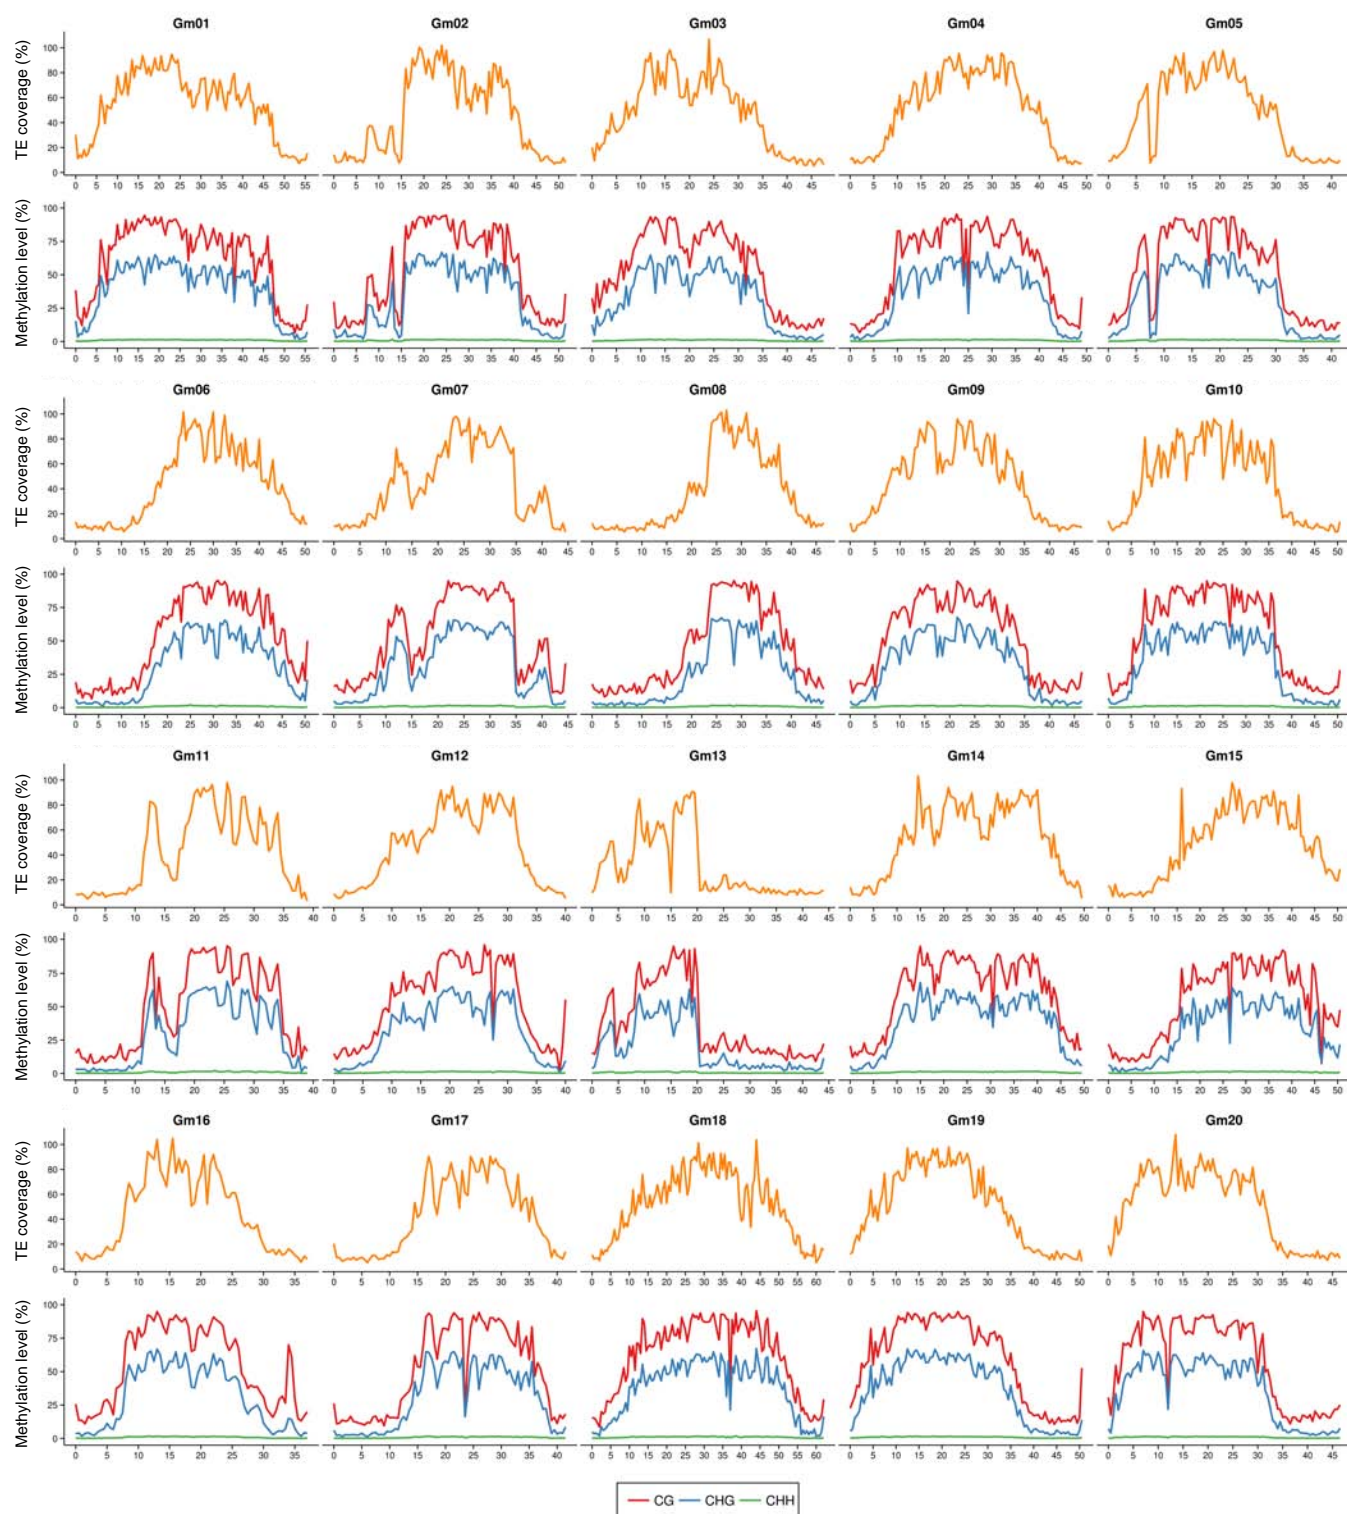

**Supplemental Figure S4.** Chromosome-wide distribution of methylation in *Glycine max* and correlation with annotated repeats in sliding 500kb windows.

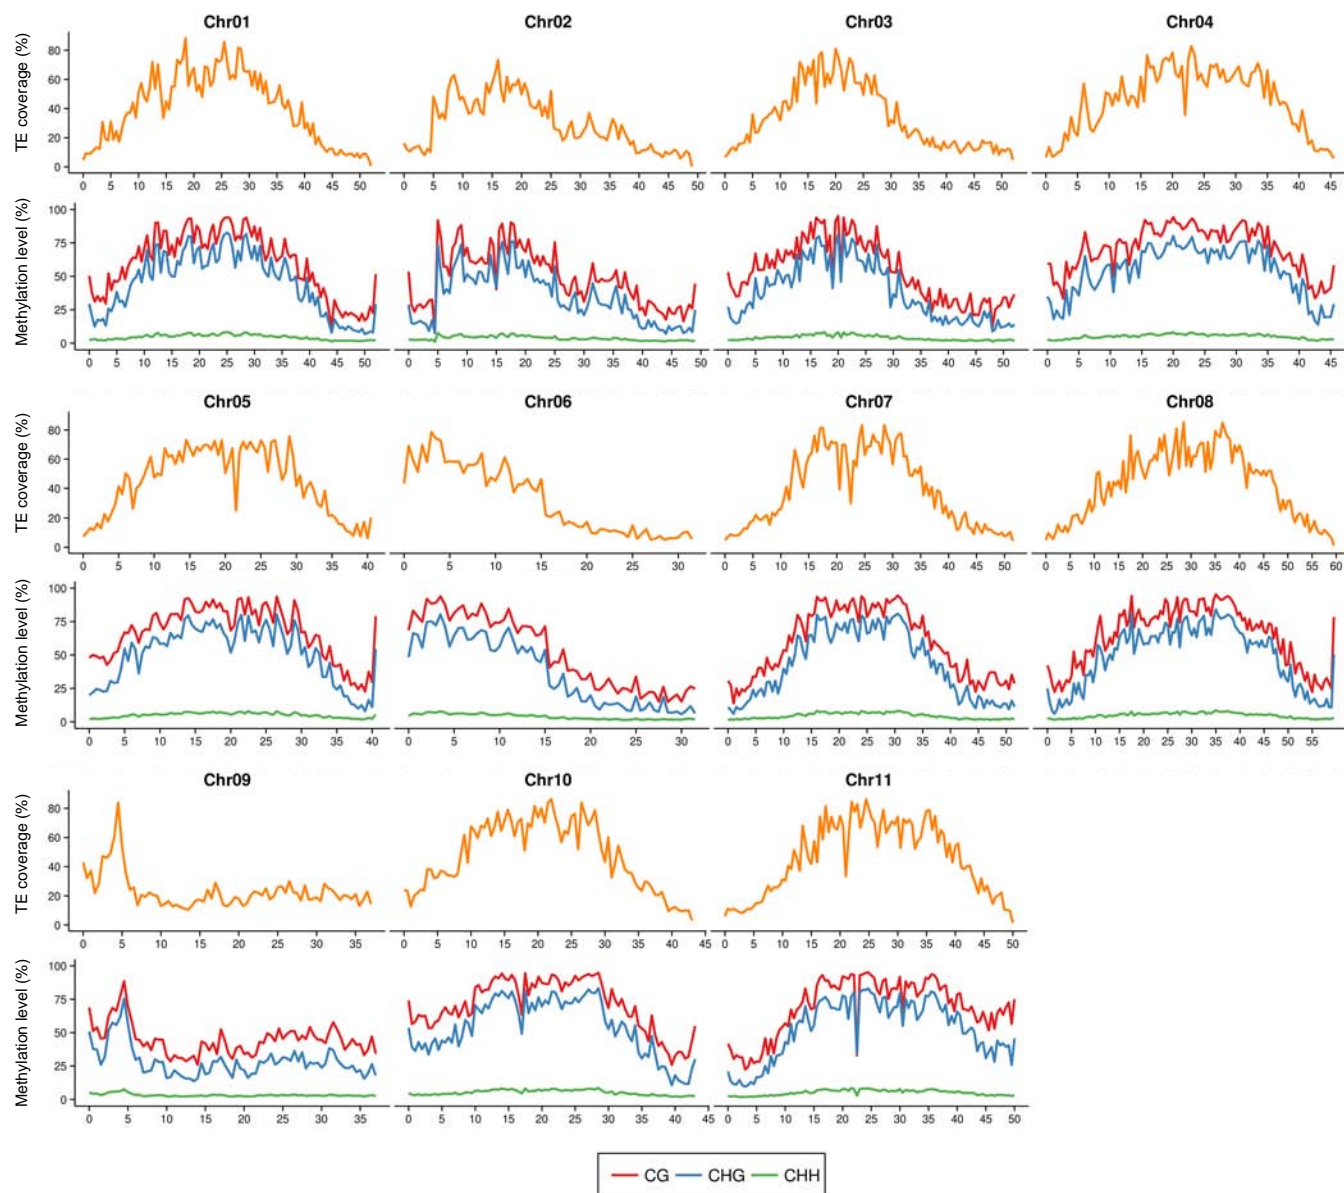

**Supplemental Figure S5.** Chromosome-wide distribution of methylation in *Phaseolus vulgaris* and correlation with annotated repeats in sliding 500kb windows.

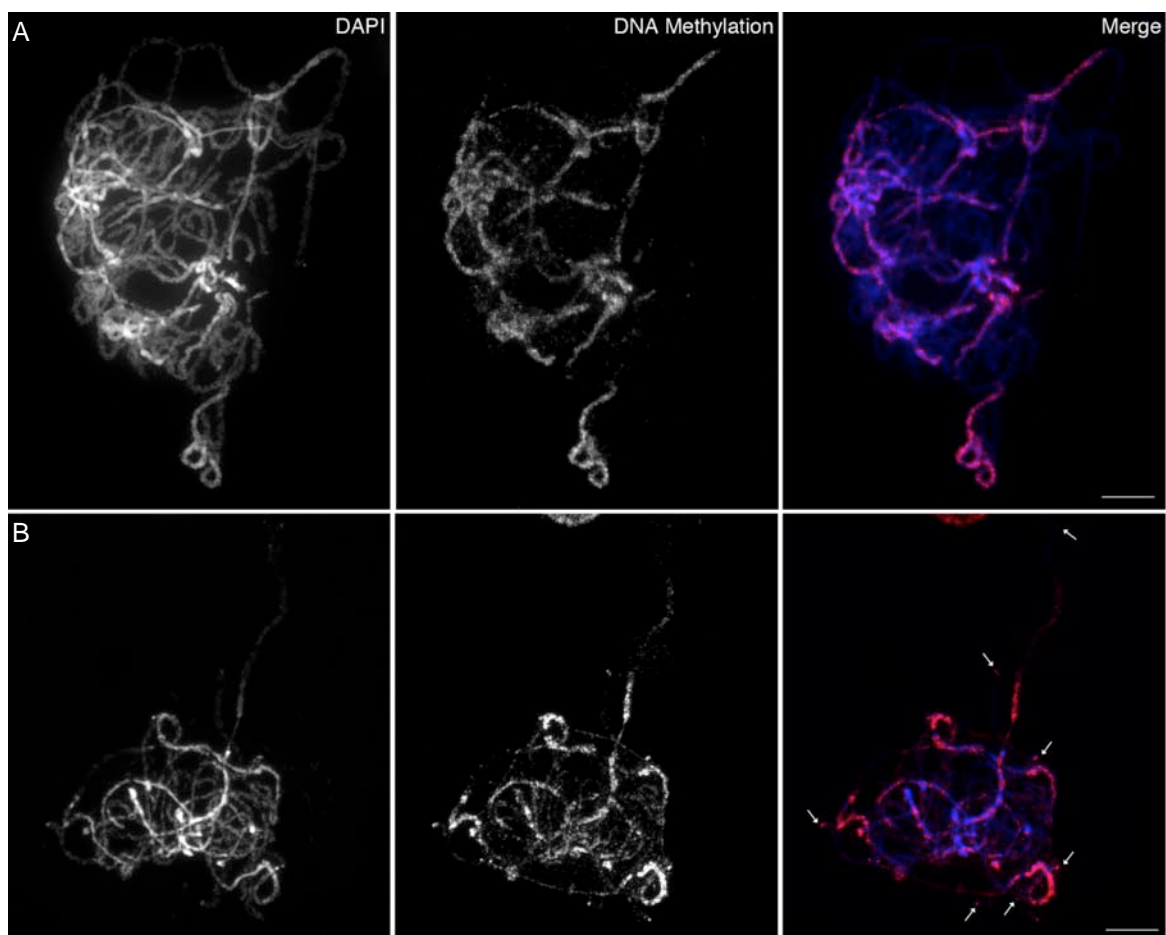

**Supplemental Figure S6.** Immunodetection of 5-methylcytosine on meiotic pachytene chromosomes of **(A)** soybean and **(B)** common bean. Arrows represent distinct heterochromatic knobs at chromosomal termini with strong 5-methylcytosine signals in common bean. Bars = 10 μm.

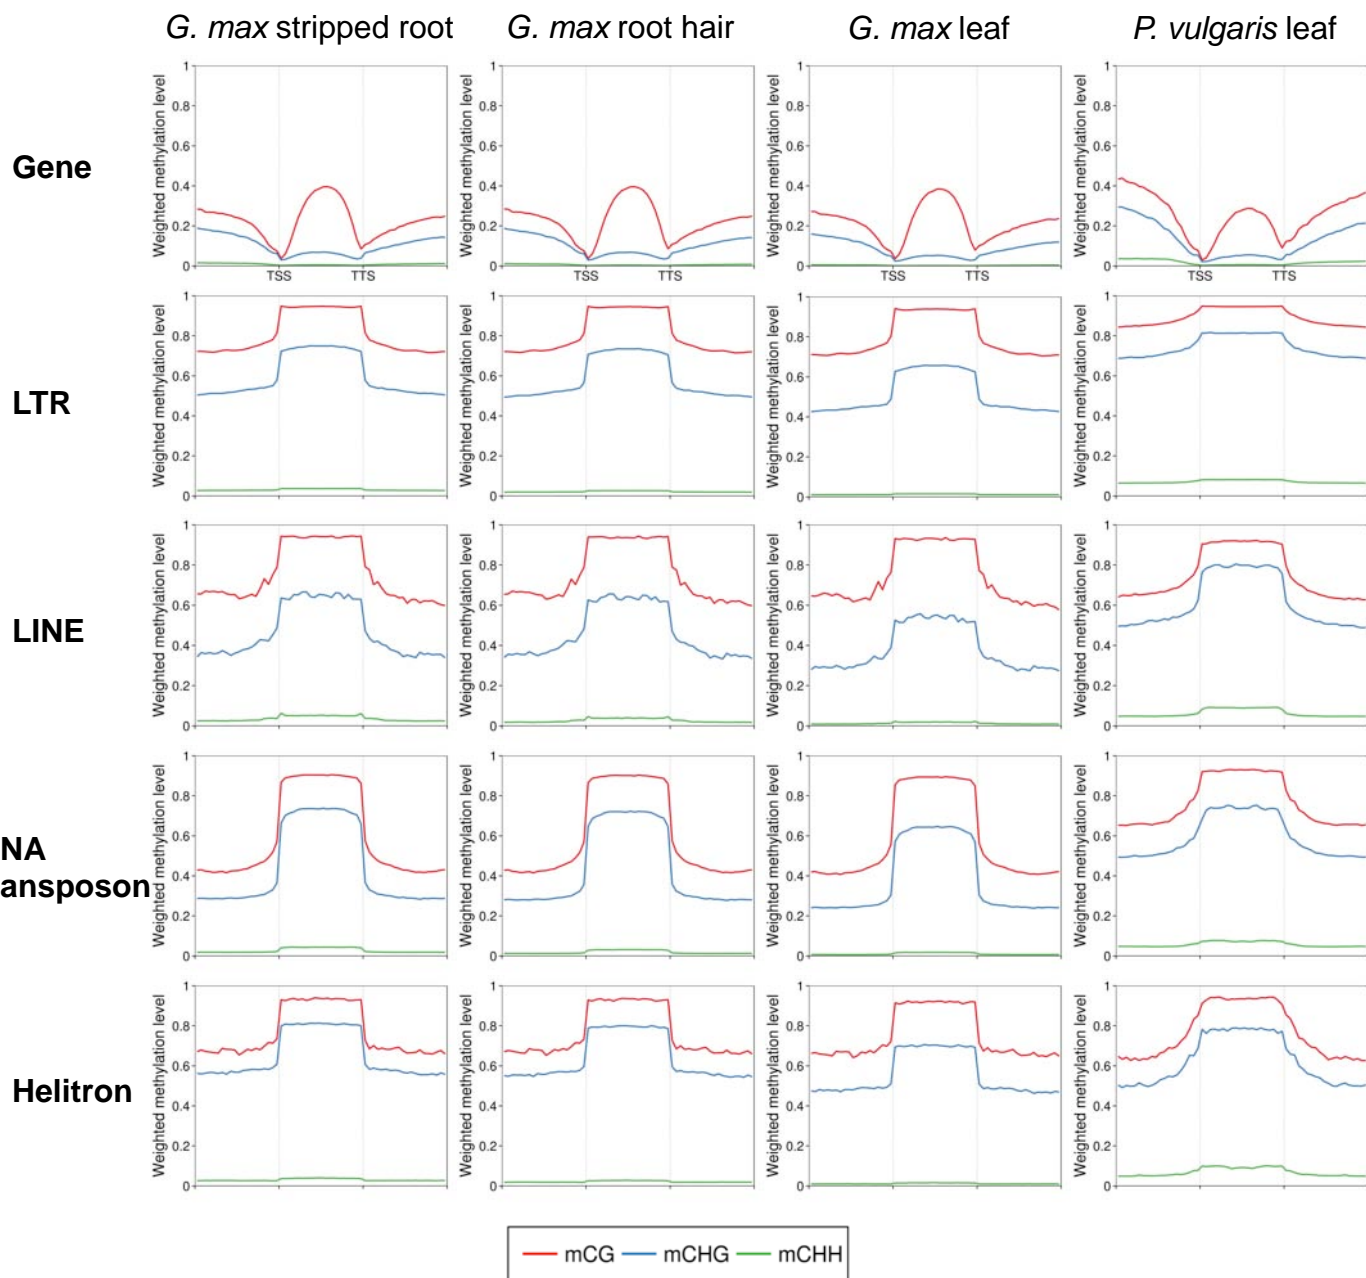

**Supplemental Figure S7.** Average distribution of DNA methylation over genes and TE categories in soybean and common bean. Flanking regions are 1kb. TSS = transcription start site. TTS = transcription termination site.

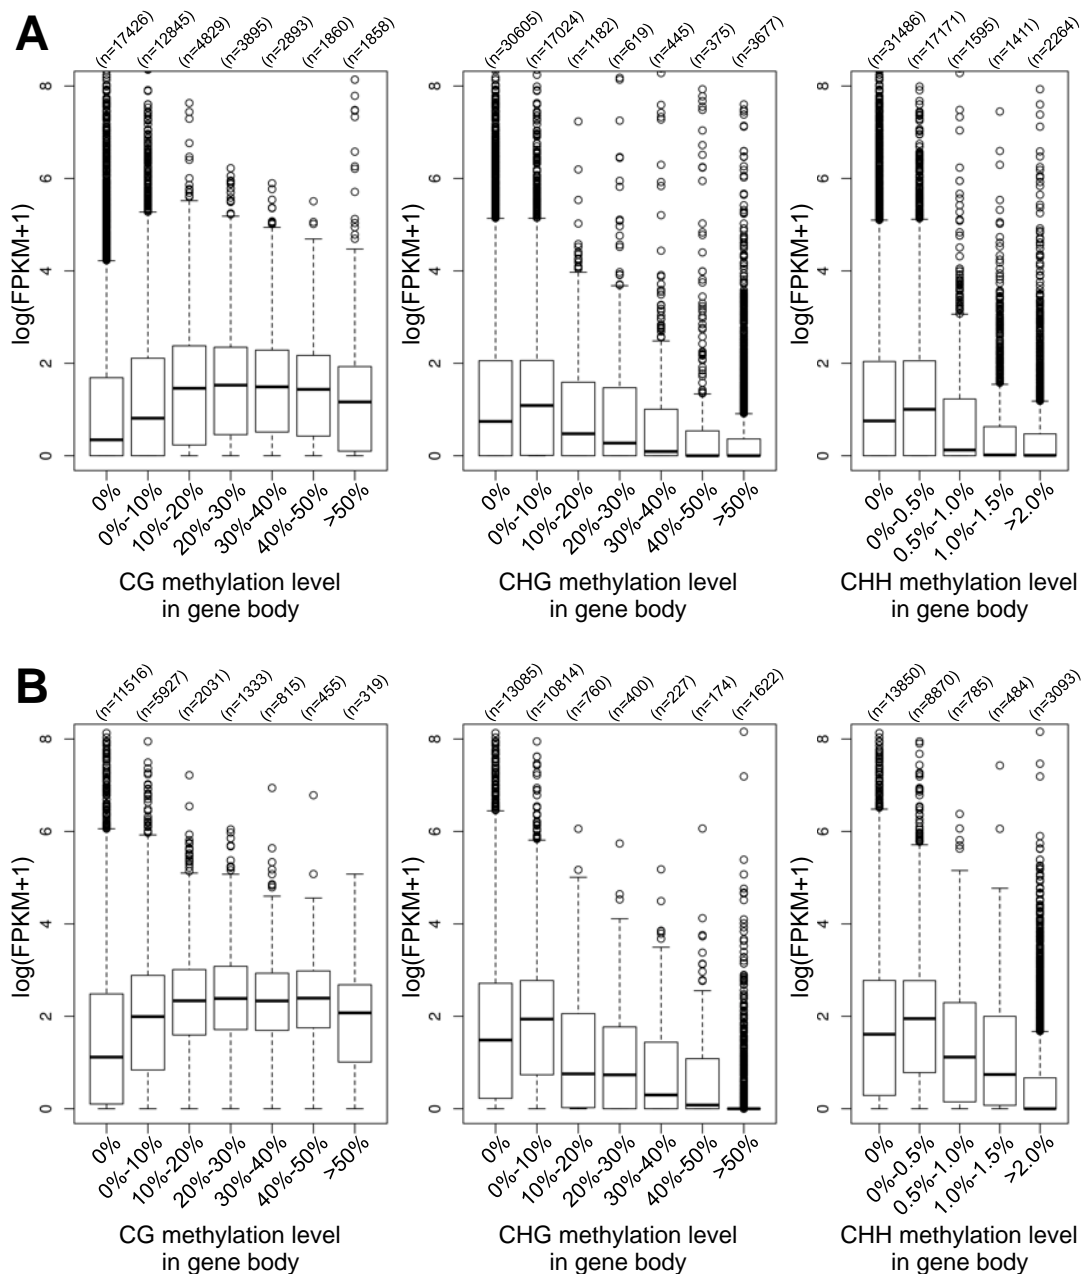

**Supplemental Figure S8.** Relationship between DNA methylation and gene expression in **(A)** soybean and **(B)** common bean. Within gene bodies, the expression levels are positively associated with CG methylation levels and negatively associated with CHG and CHH methylation levels. C methylated genes ( $P_{CHG} < 0.05$  or  $P_{CHH} < 0.05$ ) were removed for calculating CG methylation levels.



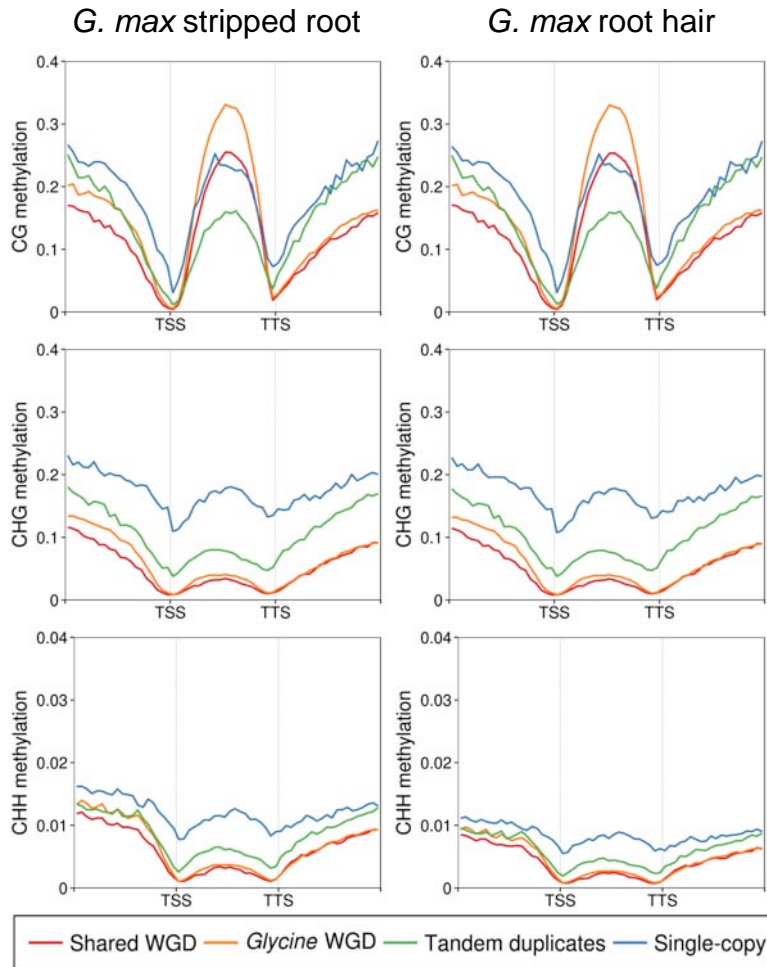

**Supplemental Figure S10.** Average distribution of DNA methylation from soybean root over different gene categories. Flanking regions are 1kb. TSS = transcription start site. TTS = transcription termination site.

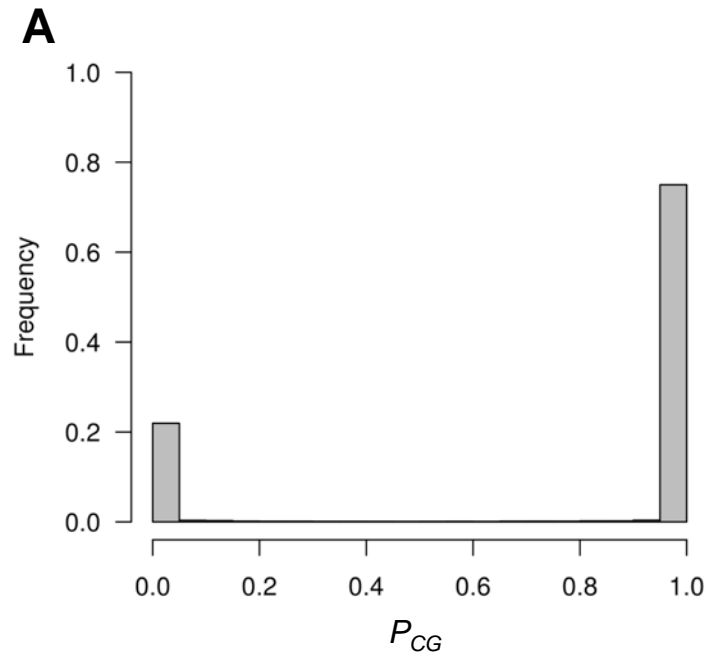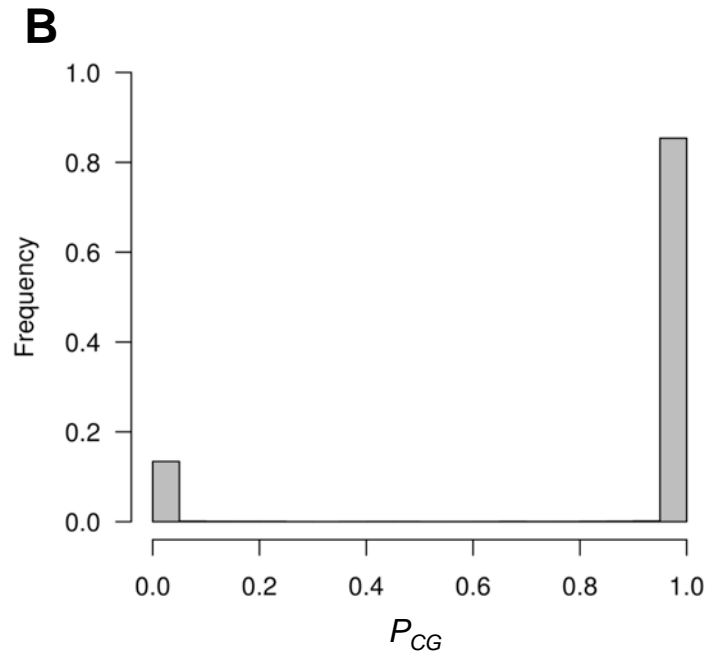

**Supplemental Figure S11.** Frequency distribution of  $P_{CG}$  after removing C methylated genes ( $P_{CHG} < 0.05$  or  $P_{CHH} < 0.05$ ) in **(A)** soybean and **(B)** common bean.

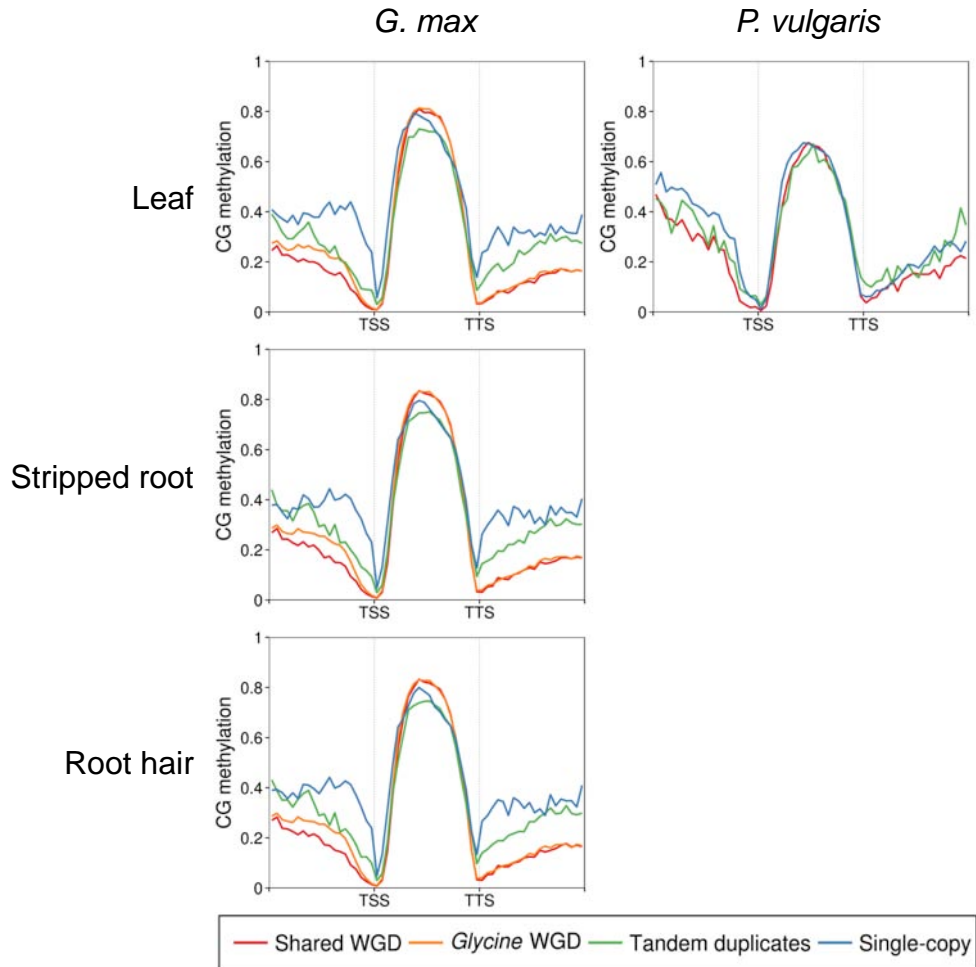

**Supplemental Figure S12.** Average distribution of DNA methylation in over CG body-methylated genes. Flanking regions are 1kb. TSS = transcription start site. TTS = transcription termination site.

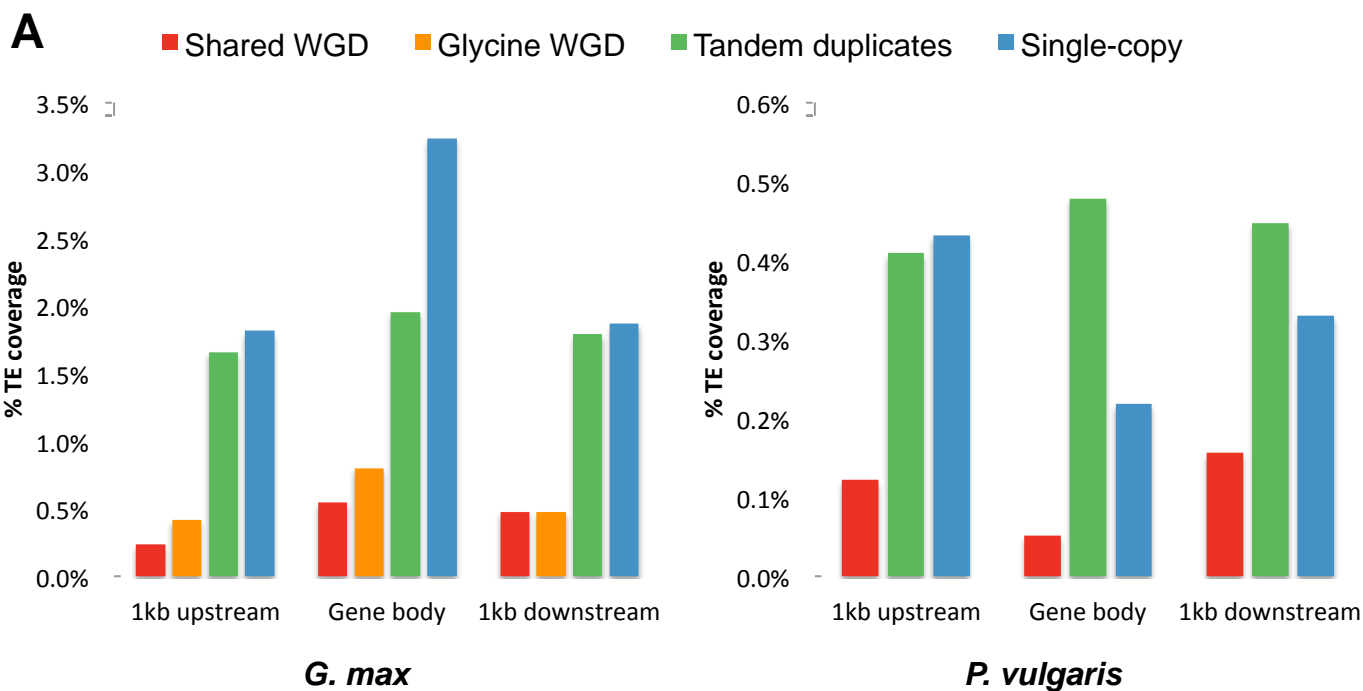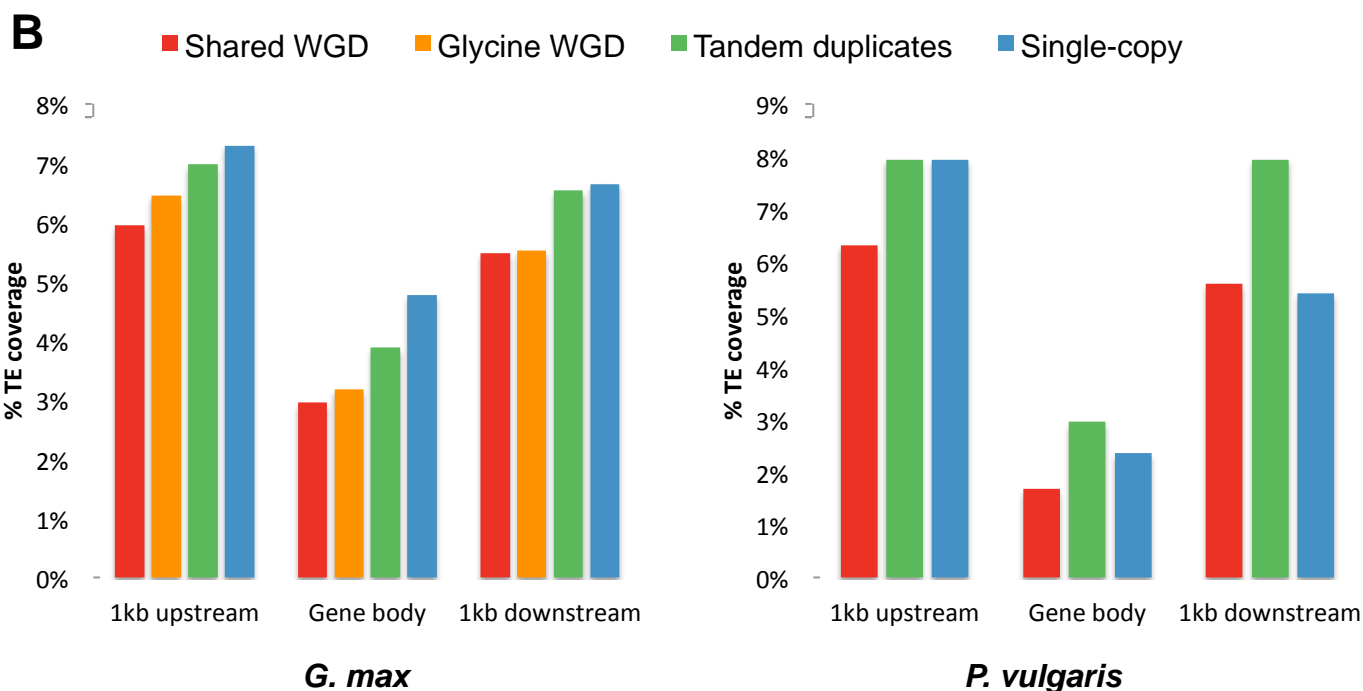

**Supplemental Figure S13.** Percent total TE in genic regions in gene categories in soybean and common bean. **(A)** Long TE (>4kb). **(B)** Short TE (<500bp).

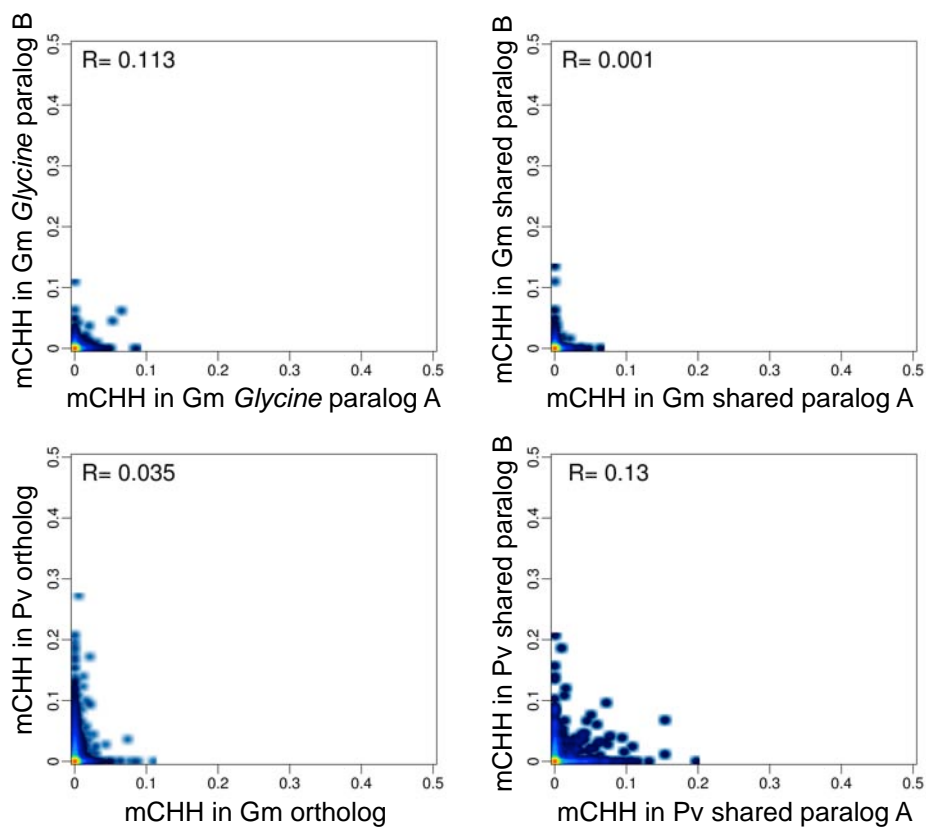

**Supplemental Figure S14.** Pairwise comparisons of CHH methylation levels between paralogous and orthologous gene pairs.  $R$  = Pearson correlation coefficient.

*G. max*

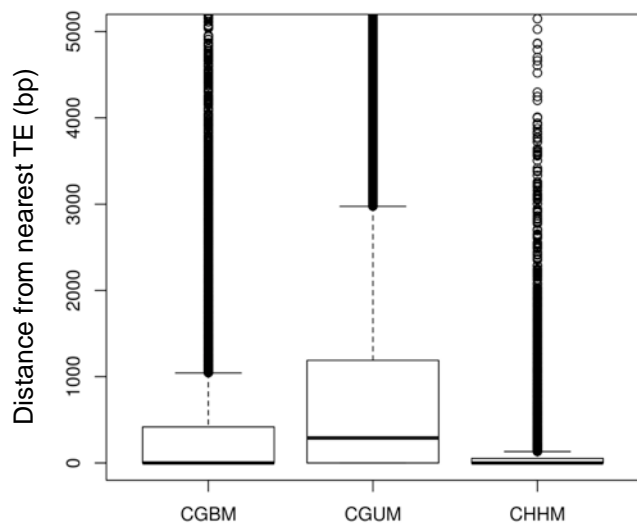

*P. vulgaris*

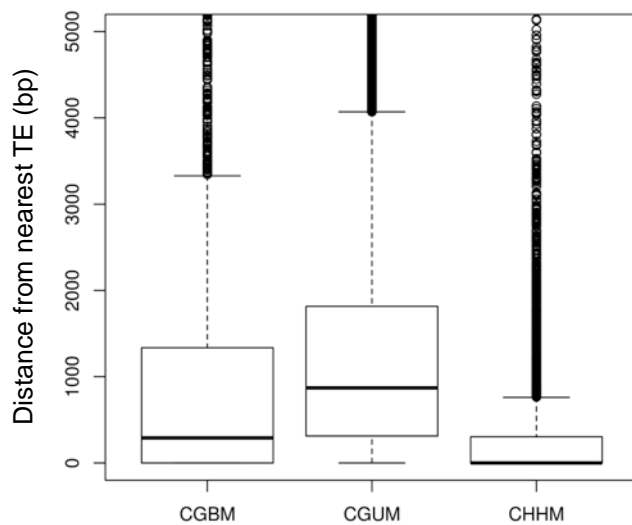

**Supplemental Figure S15.** Distance from nearest TE (transposable element) for CG body-methylated (CGBM), unmethylated (CGUM), and C methylated genes (CHHM).

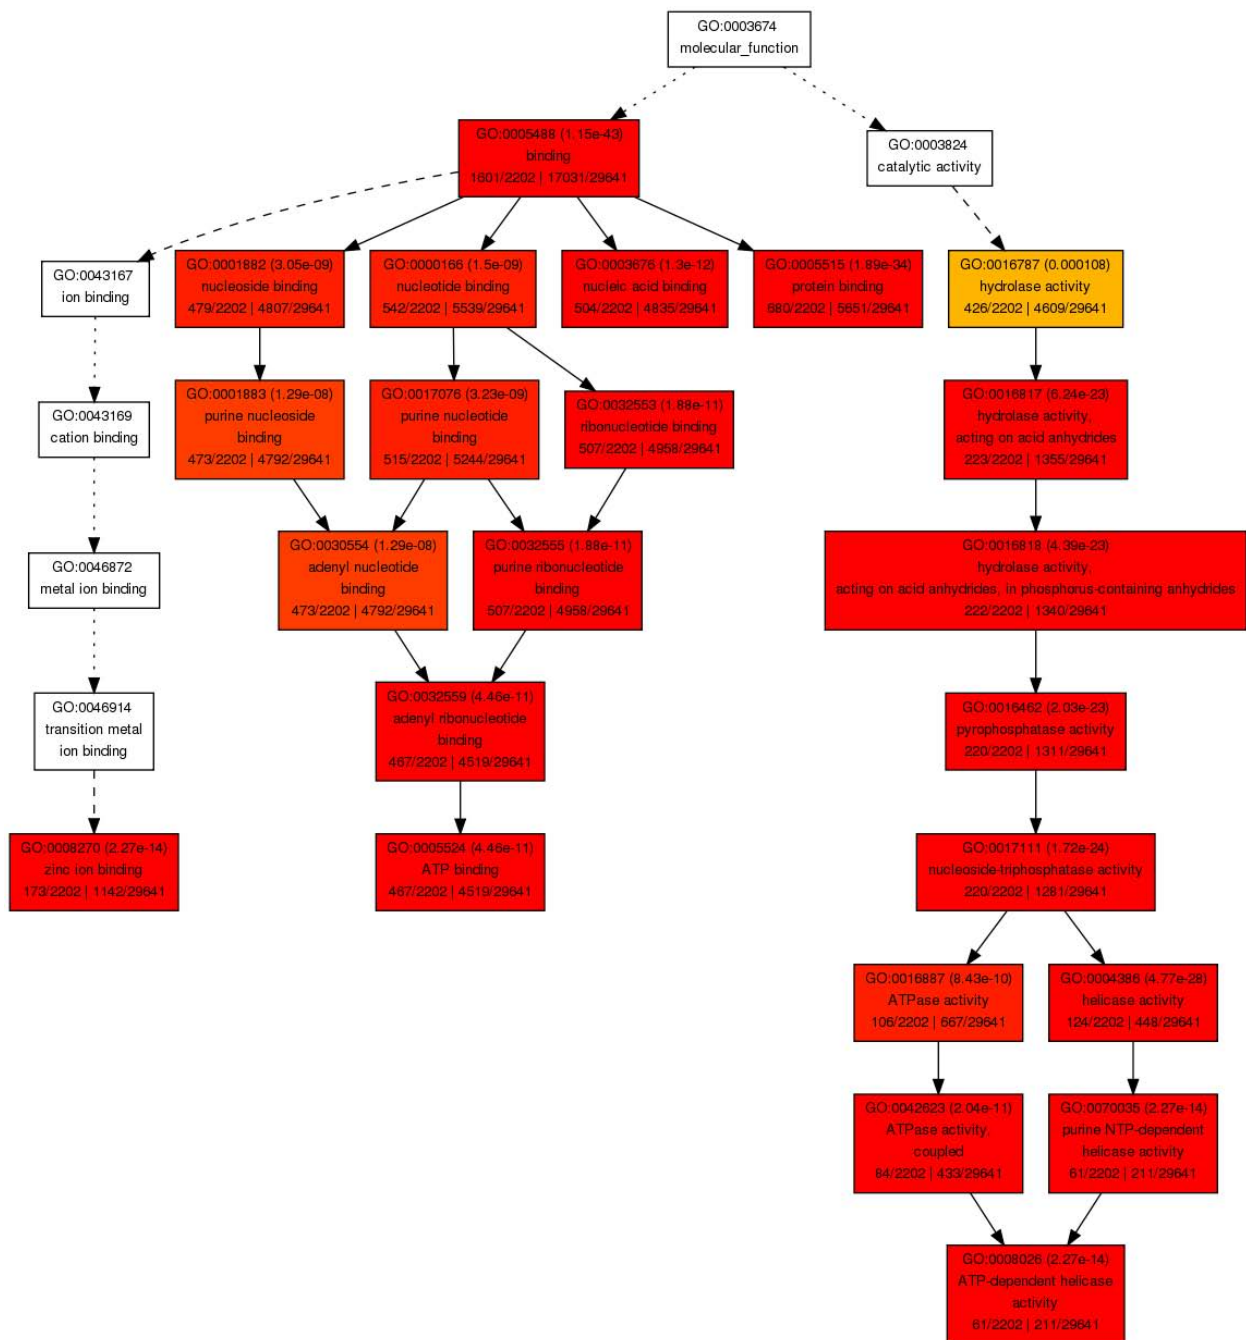

**Supplemental Figure S16.** GO categories (molecular function) enriched for conserved CG body-methylated genes.

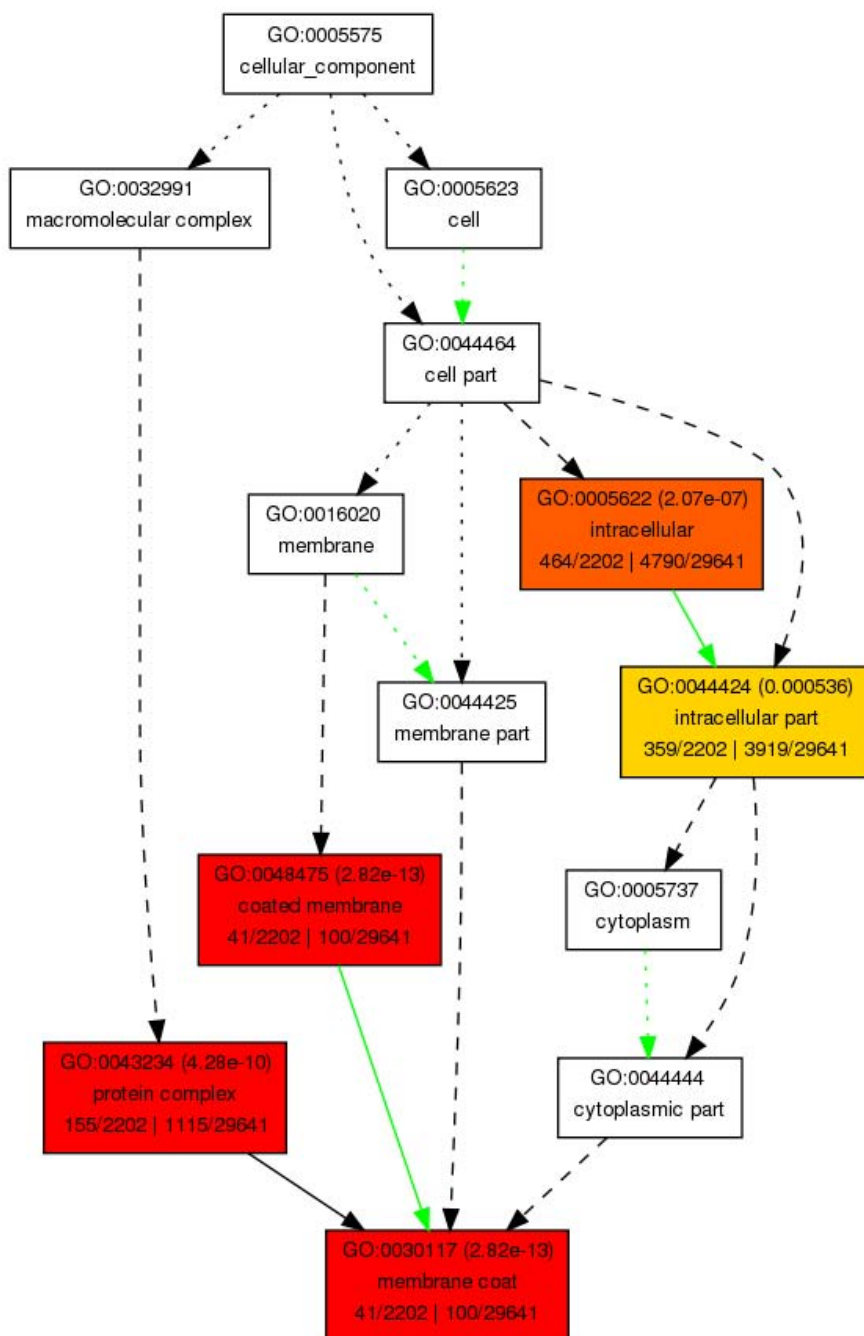

**Supplemental Figure S17.** GO categories (cellular component) enriched for conserved CG body-methylated genes.

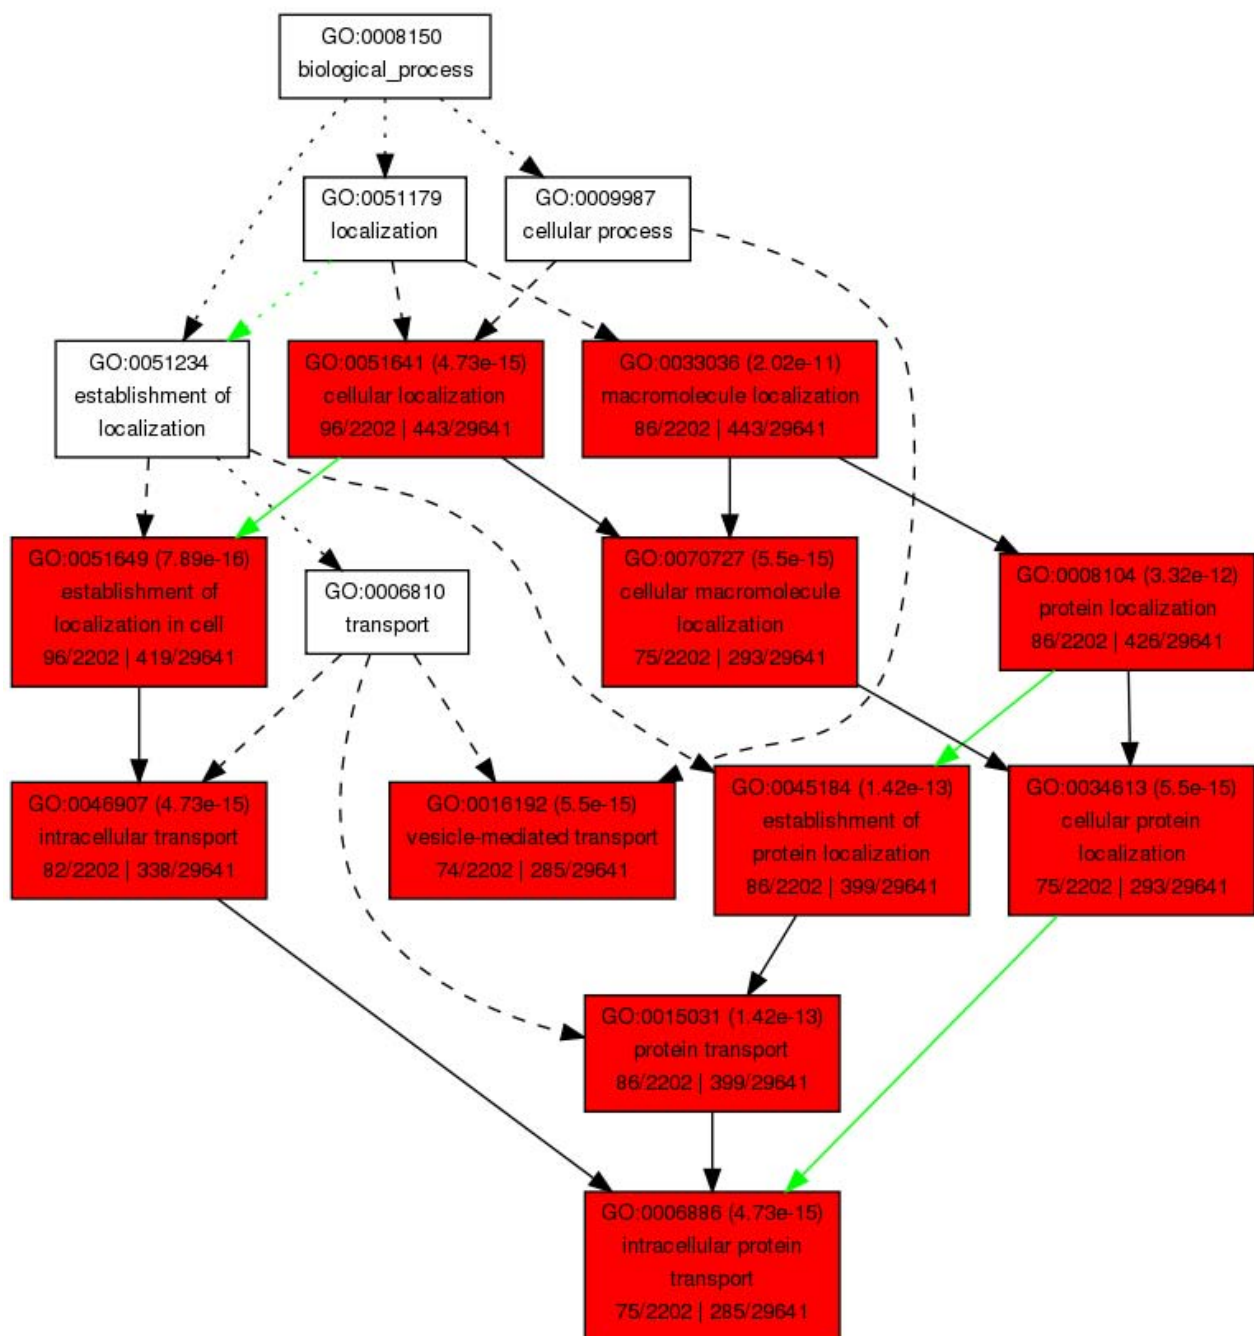

**Supplemental Figure S18.** GO categories (biological process) enriched for conserved CG body-methylated genes.

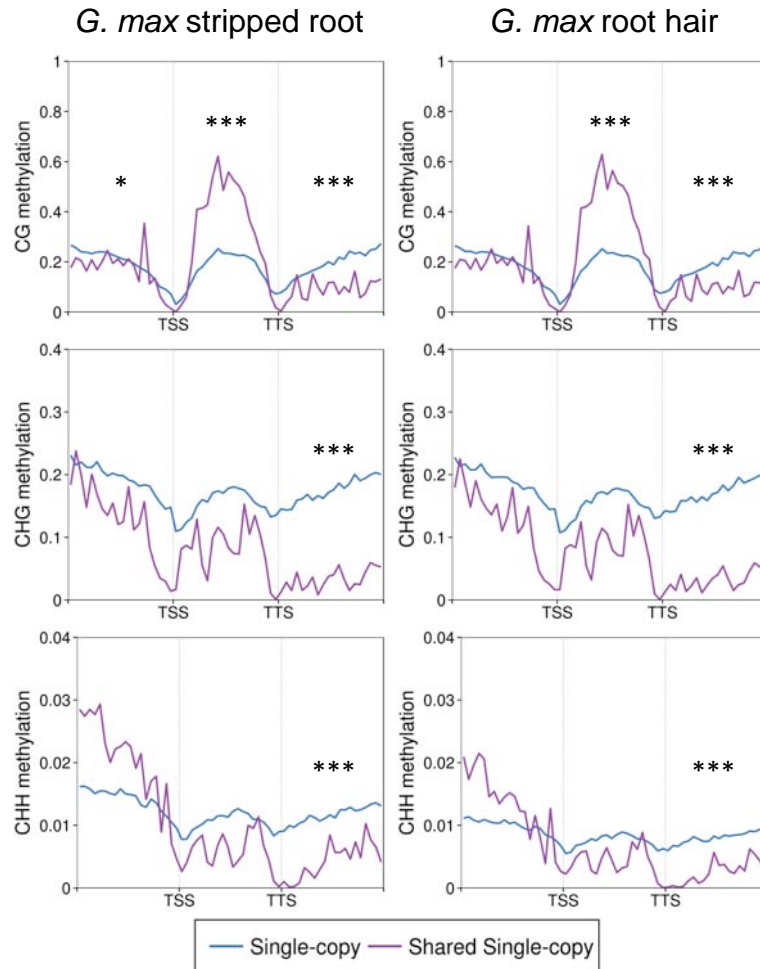

**Supplemental Figure S19.** Average distribution of DNA methylation from soybean root in shared single-copy and species-specific single-copy genes. Flanking regions are 1kb long. TSS = transcription start site. TTS = transcription termination site. Methylation level of each cytosine context was compared using the Wilcoxon rank sum test. \*\*\* =  $p < 0.001$ , \* =  $p < 0.05$ .
